# Supplementary material for: Centrosome age regulates kinetochore–microtubule stability and biases chromosome mis-segregation
Source: eLife. 2015 Aug 19;4:e07909. doi: 10.7554/eLife.07909 (PMC4579388; doi:10.7554/eLife.07909)
Supplement: Figure 1—source data 1. — DOI: http://dx.doi.org/10.7554/eLife.07909.004 [file elife07909s001.xlsx]

## Sheet: Sheet1
cell type	HeLa eGFP-Centrin1 wildtype (n=93)
Experiment	wt + DMSO
	Pol chrom, %	Pol chrom
	old	old	pol chrom total	cells
Expt I	58.8235	10	17	8
Expt II	58.5366	24	41	11
Expt III	65.7143	23	35	16
average	61.0248	57	93	35	sum
sd	4.06375	61.2903			%
s.e.m.	2.34621
cell type	RPE1 Cenexin Staining (n=295)
Experiment	10ng/ml Nocodazole
	Pol chrom, %	Pol chrom
	old	old	pol chrom total	cells
Expt I	71.0526	81	114	60
Expt II	64.5455	71	110	57
Expt III	67.6056	48	71	44
average	67.7346	200	295	161	sum
sd	3.2555	67.7966			%
s.e.m.	1.87957
cell type	RPE1 eGFP-Centrin1 (n=227)
Experiment	10ng/ml Nocodazole
	Pol chrom, %	Pol chrom
	old	old	pol chrom total	cells
Expt I	62.5	25	32	16
Expt II	73.5849	39	53	26
Expt III	67.4419	29	43	24
Expt IV	62.963	17	27	16
Expt V	75	24	32	16
Expt VI	70.5882	12	17	11
Expt VII	73.913	17	23	18
average	69.4273	163	227	127	sum
sd	5.22059	71.8062			%
s.e.m.	1.9732
cell type	HeLa eGFP-Centrin1 (n=532)
Experiment	10ng/ml Nocodazole
	Pol chrom, %	Pol chrom
	old	old	pol chrom total	cells
Expt I	66.0194	136	206	21
Expt II	67.8832	93	137	15
Expt III	58.7302	111	189	21
average	64.2109	340	532	57	sum
sd	4.8371	63.9098			%
s.e.m.	2.7927
