# Supplementary material for: Centrosome age regulates kinetochore–microtubule stability and biases chromosome mis-segregation
Source: eLife. 2015 Aug 19;4:e07909. doi: 10.7554/eLife.07909 (PMC4579388; doi:10.7554/eLife.07909)
Supplement: Figure 2—source data 1. — DOI: http://dx.doi.org/10.7554/eLife.07909.007 [file elife07909s002.xlsx]

## Sheet: Sheet1
Figure 2B							Figure 2G									Figure 2G							Figure 2 Supplement 1
cell type	RPE1 eGFP-Centrin1 (n=227)						cell type	RPE1 eGFP-Centrin1			cell type	RPE1 eGFP-Centrin1				cell type	RPE1 eGFP-Centrin1 (n=227)						cell type	HeLa eGFP-Centrin1 (n=532)
Experiment	10ng/ml Nocodazole						Experiment	MT renucleation			Experiment	MT renucleation				Experiment	10ng/ml Nocodazole						Experiment	10ng/ml Nocodazole
							Cell number	% more MT at old centrosome			Cell number	% more MT at old centrosome
	Pol chrom, %	Pol chrom					1	-0.952303			1	0.778018					Pol chrom, %	Pol chrom						Pol chrom, %	Pol chrom
	old	old	pol chrom total	cells			2	-5.23303			2	12.2196					old	old	pol chrom total	cells				old	old	pol chrom total	cells
Expt I	62.5	25	32	16			3	8.45883			3	-1.18257				Expt I	62.5	25	32	16			Expt I	66.0194	136	206	21
Expt II	73.5849	39	53	26			4	29.9045			4	-4.48774				Expt II	73.5849	39	53	26			Expt II	67.8832	93	137	15
Expt III	67.4419	29	43	24			5	-3.80709			5	-2.49966				Expt III	67.4419	29	43	24			Expt III	58.7302	111	189	21
Expt IV	62.963	17	27	16			6	2.00463			6	15.3654				Expt IV	62.963	17	27	16			average	64.2109	340	532	57	sum
Expt V	75	24	32	16			7	-4.4241			7	2.66885				Expt V	75	24	32	16			sd	4.8371	63.9098			%
Expt VI	70.5882	12	17	11			8	1.84622			8	5.22682				Expt VI	70.5882	12	17	11			s.e.m.	2.7927
Expt VII	73.913	17	23	18			9	8.89512			9	14.5246				Expt VII	73.913	17	23	18
average	69.4273	163	227	127	sum		10	9.83548			10	-8.91129				average	69.4273	163	227	127	sum		cell type	HeLa eGFP- Centrin1 (n= 306)
sd	5.22059	71.8062			%		11	-2.02684			11	12.3498				sd	5.22059	71.8062			%		Experiment	Monastrol Arrest release
s.e.m.	1.9732						12	1.63501			12	0.948083				s.e.m.	1.9732
							13	-2.70686			13	-1.29432												Pol chrom, %	Pol chrom
cell type	RPE1 eGFP-Centrin1 (n=156)						14	0.84303			14	-4.77529				cell type	RPE1 eGFP-Centrin1 (n=393)							old	old	pol chrom total	cells
Experiment	Monastrol Arrest Release						15	2.4604			15	0.573293				Experiment	CenpE Inhibition						Expt I	76.3636	42	55	15
							16	1.74752			16	-1.44264											Expt II	59.1549	42	71	14
	Pol chrom, %	Pol chrom					17	-4.17818			17	2.2684					Pol chrom, %	Pol chrom					Expt III	58.9041	43	73	22
	old	old	pol chrom total	cells			18	3.72661			18	14.9514					GM	GM	pol chrom total	cells			Expt IV	50.6849	37	73	9
Expt I	80.9524	34	42	11			19	20.9333			19	-8.38889				Expt I	56.25	27	48	9			Expt V	67.6471	23	34	8
Expt II	69.2308	54	78	28			20	2.44395			20	-5.19281				Expt II	48.0198	97	202	33			average	62.5509	187	306	68	sum
Expt III	77.7778	28	36	14			21	-6.18183			21	-17.885				Expt III	50.3497	72	143	23			sd	9.77747	61.1111			%
average	75.987	116	156	53	sum		22	10.1293			22	-0.776317				average	51.5398	196	393	65	sum		s.e.m.	4.37262
sd	6.06253	74.359			%		23	0.666844			23	-3.48868				sd	4.24222	49.8728			%
s.e.m.	3.5002						24	1.22586			24	0.279445				sd	2.44925
							25	4.62815			25	13.7253
cell type	RPE1 eGFP-Centrin1 (n=164)						26	8.0638			26	-6.69438				cell type	RPE1 eGFP-Centrin1 (n=459)
Experiment	Nocodazole Arrest Release						27	-5.77564			27	-5.59365				Experiment	CenpE Inhibition + 10ng/ml Nocodazole
							28	10.5464			28	-8.71196
	Pol chrom, %	Pol chrom					29	-2.74665			29	-13.2516					Pol chrom, %	Pol chrom
	old	old	pol chrom total	cells			30	0.558014			30	-3.25424					GM	GM	pol chrom total	cells
Expt I	62.5	40	64	19			31	6.03705			31	-1.24477				Expt I	51.6129	80	155	21
Expt II	64.7059	33	51	20			32	5.07207			32	-16.8775				Expt II	54.7771	86	157	19
Expt III	57.1429	28	49	20			33	4.207								Expt III	50.3401	74	147	19
average	61.4496	101	164	59	sum		34	5.01387								average	52.2434	240	459	59	sum
sd	3.88939	61.5854			%		35	-6.06963								sd	2.28467	52.2876			%
s.e.m.	2.24554						36	-8.12869								sd	1.31905
							37	5.19008
							38	-1.32439
							39	7.4076
							40	-6.22076
							41	-3.47676
							42	-2.37529
							43	-0.723682
							44	0.115666
							45	0.966005
							46	1.69772
							47	5.83977
							48	12.1169
							49	13.7931
							median	1.69772			median	-1.26954
							upper 99% CI	5.014			upper 99% CI	2.268
							lower 99% CI	-0.9523			lower 99% CI	-5.193
