# Supplementary material for: Centrosome age regulates kinetochore–microtubule stability and biases chromosome mis-segregation
Source: eLife. 2015 Aug 19;4:e07909. doi: 10.7554/eLife.07909 (PMC4579388; doi:10.7554/eLife.07909)
Supplement: Figure 3—source data 1. — DOI: http://dx.doi.org/10.7554/eLife.07909.011 [file elife07909s003.xlsx]

## Sheet: Sheet1
	Figure 3B					Figure 3D												Figure 3F					Figure 3H								Figure 3J							Figure 3K								Figure 3L
	cell type	RPE1 eGFP-Centrin1				cell type	RPE1 eGFP-Centrin1											cell type	RPE1 eGFP-Centrin1				cell type	HeLa eGFP-Centrin1/eGFP-CENP-A							cell type	RPE1 eGFP-Centrin1 (n=227)						cell type	RPE1 eGFP-Centrin1			HeLa eGFP-Centrin1				cell type	HeLa eGFP-Centrin1 (n=532)
	Experiment	intensity on unaligned kinetochores				Experiment	% of end-on attached polar chromosomes											Experiment	intensity in metaphase (% more on the side of the old centrosome)				Experiment	Ca2+ stability assay							Experiment	10ng/ml Nocodazole						Experiment	intensity at poles			intensity at poles				Experiment	10ng/ml Nocodazole
	Cell number	% more on KTs at old centrosome																Cell number	CREST on Kinetochores	AcTub on MT +ends	DTyrTubulin in half spindle																	Cell number	% more on old centrosome
		CENP-E	CREST				wild-type + 10ng/ml Noc		wild-type +taxol		siCtrl + 10ng/ml Noc		siDsn1 + 10ng/ml Noc		siCenexin + 10ng/ml Noc			1	-1.93237	27.849	-8.72417			% unattached KTs facing old pole			% unattached KTs facing young pole					Pol chrom, %	Pol chrom						Cenexin	pAurA	Plk1	Cenexin	pAurA	Plk1			Pol chrom, %	Pol chrom
	1	-1.23314	-7.06805				old pole	young pole	old pole	young pole	old pole	young pole	old pole	young pole	old pole	young pole		2	-9.60265	13.059	-0.795138		Expt I	43.5897			56.4103					old	old	pol chrom total	cells			1	-62.4566	7.51056	7.14286	57.2849	5.96152	-22.2132			old	old	pol chrom total
	2	-1.13795	-3.5683			Expt I	12.8866	6.77966	26	28.7879	32.0312	22.3404	12.2222	8.88889	12	11.7647		3	-2.0979	60	-0.394626		Expt II	39			61				Expt I	62.5	25	32	16			2	39.2461	-6.09836	-2.48347	42.522	-5.40825	1.98134		Expt I	66.0194	136	206
	3	-0.51578	-1.57712			Expt II	14.1026	4.41176	14.5833	13.6364	25.4717	10.9756	17.2414	22.7273	18.9189	16.129		4	24.43	32.0624	-0.340162		Expt III	46.9799			53.0201				Expt II	73.5849	39	53	26			3	51.1897	22.6042	-6.98526	41.1046	10.2203	-6.35983		Expt II	67.8832	93	137
	4	-0.320211	-0.41643			Expt III	12.5	2.22222	19.6429	22.9167	19.2308	7.89474	12.5	16.6667	17.8571	16.6667		5	-15.6089	-73.3333	0.938558		average	43.1899			56.8101				Expt III	67.4419	29	43	24			4	52.5051	-2.51678	-13.1978	36.1833	8.72708	9.71714		Expt III	58.7302	111	189
	5	0.0826978	0.127588			average	13.1631	4.47122	20.0754	21.7803	25.5779	13.7369	13.9879	16.0943	16.2587	14.8535		6	6.55633	45.3722	-1.06827		s.e.m.	2.31225			2.31225				Expt IV	62.963	17	27	16			5	-60.3013	-4.25033	4.91576	52.8345	0.120493	10.6949		average	64.2109	340	532
	6	0.316209	0.348147			s.e.m.	0.482828	1.31596	3.3028	4.41062	3.69556	4.39273	1.62873	4.00504	2.15129	1.55216		7	5.1186	61.5595	-2.70461										Expt V	75	24	32	16			6	59.4819	18.1302	14.2031	32.5668	15.4583	20.0495		sd	4.8371	63.9098
	7	0.703483	0.638547															8	14.3673	-16.7582	1.44536										Expt VI	70.5882	12	17	11			7	-63.3739	-6.979	21.136	54.8009	18.7737	-19.4653		s.e.m.	2.7927
	8	1.06652	2.71192															9	4.25703	85.3333	0.323304										Expt VII	73.913	17	23	18			8	32.6417	-18.0894	-2.99219	43.7518	4.38671	17.9542
	9	2.38951	2.75053															10	-17.9058	6.33947	0.447974										average	69.4273	163	227	127	sum		9	41.3079	11.7899	3.66773	64.6052	10.9413	-1.64534		cell type	HeLa eGFP-Centrin1 (n=748)
	10	5.12359	2.91215															11	-18.1688	45.6954	0.153026										sd	5.22059	71.8062			%		10	47.0714	-5.21978	0.688468	59.5251	-8.24227	-4.16584		Experiment	AuroraA Inhibiton + 10ng/ml nocodazole
	11	-10.3823	-3.06942															12	-19.7248	48.0392	-1.52065										s.e.m.	1.9732						11	-62.9717	1.50451	-11.2282	55.3571	-0.367534	22.3192
	12	-6.29669	-2.73929															13	24.037	42.9838	-2.07586																	12	75.0412	12.164	8.12234	40.8659	4.34858	-23.8276			Pol chrom, %	Pol chrom
	13	-0.707893	-2.62373															14	-11.3979	-70.5128	0.735342										cell type	RPE1 eGFP-Centrin1 (n=105)						13	-31.4157	10.1707	6.6016	10.4441	5.45728	2.35546			old	old	pol chrom total
	14	-0.425811	-1.92144															15	-1.70649	-35.8025	-0.604994										Experiment	5nM Taxol						14	76.6772	-14.7075	-1.48114	79.6199	33.957	-7.96366		Expt I	59.7222	86	144
	15	2.16374	-1.19571															16	1.31752	-31.3093	-0.93902																	15	33.3333	21.832	4.09691	41.5856	18.4106	16.2197		Expt II	57.0292	215	377
	16	2.61422	-0.873681															17	-18.7368	22.2339	-0.0653259											Pol chrom, %	Pol chrom					16	55.2251	-11.8069	10.009	55.4182	28.4458	4.74708		Expt III	62.1145	141	227
	17	2.6305	1.99421															18	-19.0429	33.4243	-0.09204											old	old	pol chrom total	cells			17	34.0164	1.50369	9.07214	60.6214	16.9177	-5.56783		average	59.622	442	748
	18	6.06751	2.37459															19	-8.84354	-36.535	-1.57369										ExptI	54.1667	13	24	12			18	56.9977	10.8699	-4.01798	-22.2039	-7.61879	-5.67376		sd	2.54416	59.0909
	19	-2.11361	-3.81833															20	17.5258	-9.70874	-1.17173										ExptII	28.8889	13	45	21			19	4.51703	18.8119	16.8275	47.027	-10.3956	12.7675		s.e.m.	1.46887
	20	9.11459	3.46049															21	6.04839	34.4648	-0.256878										ExptIII	55.5556	20	36	17			20	66.3641	13.949	-10.6901	58.0343	3.30447	-3.31555
	21	7.38997	-0.832106															22	1.38889	21.3115	-0.646505										average	46.2037	46	105	50	sum		21		5.07095	-4.375	28.02	8.2396	7.98914		cell type	HeLa eGFP-Centrin1 (n=171)
	22	0.702369	-0.449443															23	7.98283	-0.906096	-0.0551736										sd	15.0111	43.8095			%		22		6.99895	15.828	51.7765	15.6608	-17.5196		Experiment	Plk1 Inhibiton + 10ng/ml nocodazole
	23	-4.64528	-0.61921															24	-4.45714	-39.3939	0.22484										s.e.m.	8.66669						23		-0.185446	4.33857	28.2421	3.93661	13.4712
	24	-3.67195	1.47121															25	-17.0125	3.18091	0.225799																	24		21.347	0.480684	27.7829	14.1077	17.8571			Pol chrom, %	Pol chrom
	25	9.86792	-1.41415															26	6.74003	-38.4496	0.1638										cell type	RPE1 eGFP-Centrin1 (n=206)						25		10.0989	-13.5423	45.4221	6.34871	22.1547			old	old	pol chrom total
	26	4.27539	-1.00497															27	1.54639	69.5082	-1.57064										Experiment	siCtrl + 10ng/ml Nocodazole						26		10.8659	-14.382	72.17	3.29743	-14.332		ExptI	63.6364	14	22
	27	4.93527	1.99997															28	13.0435	52.7687	0.0340427																	27		1.33546	-0.0911162	30.6999	0.635149	-12.7752		ExptII	41.6667	15	36
	median	0.702369	-0.61921															29	13.2505	-14.8707	0.696448											Pol chrom, %	Pol chrom					28		14.2954	4.98566	-52.8173	6.10765	7.56723		Expt III	60.7843	31	51
	upper 99% CI	2.631	1.471															30	1.82768	9.63705	-0.0708582											old	old	pol chrom total	cells			29		-9.80947	-18.6575	40.6648	13.907	3.14514		Expt IV	54.8387	34	62
	lower 99% CI	-0.7079	-1.577															31	0.165289	15.3846	0.428429										Expt I	78.5714	45	57	32			30		-3.6845	5.12441	42.6857	5.15987	-10.3301		average	55.2315	94	171
																		32	-4.57317	-20.0946	-3.17925										Expt II	61.1111	44	72	26			31		8.16342	-26.6931	47.4909	28.3742	1.13031		sd	9.75764	54.9708
																		33	25.2802	49.2795	-0.447101										Expt III	76.4706	13	17	7			32		4.96366	-19.3401	48.985	28.0108	-3.47456		s.e.m.	4.87882
																		34	15.71	-35.4691											Expt IV	65	39	60	27			33		-5.12847	8.26453	67.3888	13.5661	-14.1049
																		35	-13.8196	9.77918											average	70.2883	141	206	92	sum		34		-9.44474	-10.5659	69.5934	-13.8828	43.7036
																		36	8.53762	-34.3899											sd	8.54435	68.4466			%		35		7.9196	-9.19447	42.4406	5.02131	-22.3566
																		37	-13.8241	29.9065											s.e.m.	4.27218						36		4.62798	8.99274	75.7869	-2.60107	-2.42279
																		38	-4.90066	24.7312																		37		4.76309	-0.730271	66.0277	16.5923	-11.6195
																		39	-13.4396	28.9474											cell type	RPE1 eGFP-Centrin1 (n=162)						38		7.3831	5.67303	57.1291	-18.7695	-16.9043
																		40	-8.78579	61.9048											Experiment	siDsn1 + 10ng/ml Nocodazole						39		2.35507	11.3318	47.1215	8.24564	1.82476
																		41	-5.12367	-1.55039																		40		-5.66546	-7.96037	62.6714	8.86622	7.20469
																		42	9.71963	58.046												Pol chrom, %	Pol chrom					41		-11.5485	33.4511	-49.5333		22.9239
																		43	9.97151	62.8571												old	old	pol chrom total	cells			42		-5.11175	14.2894	45.2523		-5.41722
																		44	4.21585	8.81517											Expt I	58.3333	14	24	6			43		-8.72483	-8.0033	71.0445		0.120651
																		45	-2.45747	60.1351											Expt II	44	44	100	22			44		-4.79392	36.6391	77.6707		-25.9655
																		46	-20.7116	-2.89017											Expt III	34.2105	13	38	14			45		0.378146	14.4644	55.7689		-6.12579
																		47	5.40541	-34.0369											average	45.5146	71	162	42	sum		46		23.9471	-1.50678	21.5641		36.31
																		48	90.9091	-19.6721											sd	12.1325	43.8272			%		47		-4.63027	-9.04598	34.3269		-19.5141
																		49	8.65385	59.5908											s.e.m.	7.00471						48		2.52941	-12.824	51.2532		-13.304
																		50	-9.70782	63.4568																		49		12.7175	2.8279	44.7198		-18.2397
																		51	32.8235	34.3669											cell type	RPE1 eGFP-Centrin1 (n=46)						50		27.8123	17.9773	37.6839		-6.68023
																		52	25.5973	-42.2505											Experiment	siNnf1 + 10ng/ml Nocodazole						51		3.94622	7.10102	55.9059		4.66083
																		53	-1.23153	-45.3271																		52		7.64987	6.49477	57.6932		-1.75228
																		54	-2.76714	41.6259												Pol chrom, %	Pol chrom					53		18.6742	11.0236	55.9937		13.7578
																		55	-21.7172	50.8902												old	old	pol chrom total	cells			54		5.3697	-41.6264	13.4343		22.2168
																		56	24.7645	-39.5854											Expt I	42.8571	3	7	5			55		4.88119	5.17741	47.7315		-46.3891
																		57	-42.1903	-46.8165											Expt II	50	6	12	3			56		-16.2509	-31.471	55.5556		-20.0714
																		58	7.83898	33.4448											Expt III	66.6667	6	9	4			57		24.9314	17.9035	61.2412		-8.32562
																		59	-2.68528	100											Expt IV	53.8462	7	13	7			58		-5.52431	-17.5521	56.8017		-10.7299
																		60	13.6276	-34.877											Expt V	40	2	5	2			59			30.4683	79.2552		-23.4316
																		61	14.3317	28.0575											average	50.674	24	46	21	sum		60			-13.7558	80.2836		10.2976
																		62	30.9144	60.9929											sd	10.5038	52.1739			%		61			-25.645	62.9182		-18.9477
																		63	1.15473	-40.678											s.e.m.	4.69744						62			-8.04111	77.9152		-2.27475
																		64	8.49057	-20.1521																		63			-10.6083	71.0914		5.11329
																		65	15.9509	-38.0822											cell type	RPE1 eGFP-Centrin1 (n=29)						64			29.9866	69.2529		-5.9453
																		66	16	34.0153											Experiment	siMCAK + 10ng/ml Nocodazole						65			3.74065	42.4432		-25.3092
																		67	1.9774	-36.5854																		66			-16.5651	83.0819		4.62825
																		68	7.03125	55.1282												Pol chrom, %	Pol chrom					67				49.7811		-27.4154
																		69	1.80723	-23.2493												old	old	pol chrom total	cells			68				44.2796
																		70	-9.85915	23.3645											ExptI	66.6667	2	3	3			69				69.9909
																		71	23.2	69.3507											ExptII II	66.6667	4	6	4			70				64.5856
																		72	13.7349	-25.0859											ExptII III	90	9	10	5			71				70.7106
																		73	20.4082	-67.0886											ExptI IV	80	4	5	3			72				63.6021
																		74	-13.0435	-17.1946											ExptII V	60	3	5	3			73				71.7732
																		75	0.429184	44.7699											average	72.6667	22	29	18	sum		74				39.3377
																		76	-6.71937	16.8539											sd	12.1106	75.8621			%		75				61.7034
																		77	30.7329	7.35931											s.e.m.	5.41603						76				97.7152
																		78	5.47264	63.2258																		77				66.4104
																		79	5.44662	41.9355											cell type	RPE1 eGFP-Centrin1 (n=169)						78				65.9522
																		80	-3.47826	-72.7273											Experiment	siNinein + 10ng/ml Nocodazole						79				71.9796
																		81	44.7942	81.3253																		80				54.4544
																		82	-1.49254	109.091												Pol chrom, %	Pol chrom					81				32.3597
																		83	-45.679	6.74157												old	old	pol chrom total	cells			median	40.277	4.69554	1.75819	52.3055	6.22818	-2.86917
																		84	34.3396	-3.22581											Expt I	82.3529	14	17	5			upper 95% CI	55.23	7.511	5.177	57.69	10.94	1.981
																		85	21.4286	71.0583											Expt II	42.8571	3	7	4			lower 95% CI	4.517	0.3781	-4.018	47.49	4.349	-6.36
																		86	17.2185	-51.3043											Expt III	58.9286	33	55	26
																		87	7.53065	45.977											Expt IV	71.1111	32	45	20
																		88	13.9168	3.90738											Expt V	68.8889	31	45	22
																		89	3.9501	30.4348											average	64.8277	113	169	77	sum
																		90	-4.85133	71.8833											sd	14.8376	66.8639			%
																		91	8.05369	40.7407											s.e.m.	6.63556
																		92	-8.03571	-3.7037
																		93	41.1471	74.6641											cell type	RPE1 eGFP-Centrin1 (n=80)
																		94	19.0539	38.1333											Experiment	siCenexin + 10ng/ml Nocodazole
																		95	29.6296	59.8039
																		96	3.87597	64.6154												Pol chrom, %	Pol chrom
																		97	-8.57143	-98.1221												old	old	pol chrom total	cells
																		98	-11.4035	100											Expt I	54.1667	13	24	8
																		99	-9.77131	49.1892											Expt II	57.5758	19	33	15
																		100	-0.390625	-19.5572											Expt III	56.5217	13	23	17
																		101	-4.38695	-70.0658											average	56.0881	45	80	40	sum
																		102	-3.93901	21.519											sd	1.74543	56.25			%
																		103	-15.942	-4.65116											s.e.m.	1.00773
																		104	-9.89011	49.4845
																		105	7.95848	-52.381
																		106	-8.88889	49.7872
																		107	-14.17	-73.1093
																		108	7.50988	39.0863
																		109	-3.05677	34.7945
																		110	-17.5532	20.8955
																		111	16.9697	39.6226
																		112	18.1395	95.3757
																		113	24.3986	44.1606
																		114	24.1477	84.3308
																		115	-11.368	47.548
																		116	-11.6564	84.9091
																		117	-17.3815	51.0297
																		118	4.55312	-2.21402
																		119	-9.09091	2.25989
																		120	-4.38449	-20.548
																		121	15.886	33.7963
																		122	17.207	63.5197
																		123	4.2654	76.5417
																		124	23.445	-6.43016
																		125	12.6492	0.606061
																		126	13.0435	10.8225
																		127	-50.8299	22.49
																		128	10.7843	0.970874
																		129	-17.6471	-23.3766
																		median	1.9774	22.49	-0.256878
																		upper 95% CI	6.556	34.02	1.53
																		lower 95% CI	-1.706	7.359	-0.7951
[truncated: 20 more columns]
