# Supplementary material for: Centrosome age regulates kinetochore–microtubule stability and biases chromosome mis-segregation
Source: eLife journal article supplement (doi:10.7554/elife.07909), 2015-08-19
Supplement: supp [file elife-07909-supp-v1.zip]

Figure 2 Figure Supplement 2  
Gasic et al.,

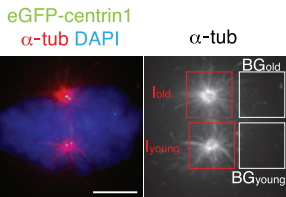

|                        |                                                                                                              |
|------------------------|--------------------------------------------------------------------------------------------------------------|
| Percent difference     | $= \frac{(I_{old}-BG_{old})-(I_{young}-BG_{young})}{(I_{old}-BG_{old})+(I_{young}-BG_{young})} \times 100\%$ |
| $I_{old}$              | :summed signal intensity on old centrosome                                                                   |
| $I_{young}$            | : summed signal intensity on young centrosome                                                                |
| $BG_{old}, BG_{young}$ | : background intensity near respective centrosome                                                            |
