# Supplementary figures and images for: Centrosome age regulates kinetochore–microtubule stability and biases chromosome mis-segregation
Source: eLife journal article supplement (doi:10.7554/elife.07909), 2015-08-19

Figure 3 Figure Supplement 2  
Gasic et al.,

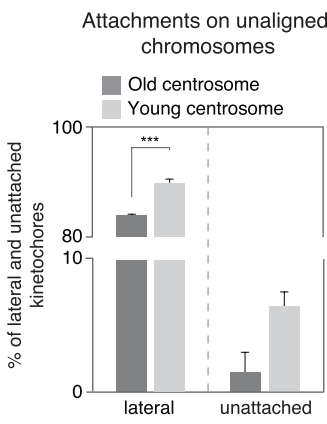

Supplement: supp [file elife-07909-supp-v1.zip]

Figure 3 Figure Supplement 4  
Gasic et al

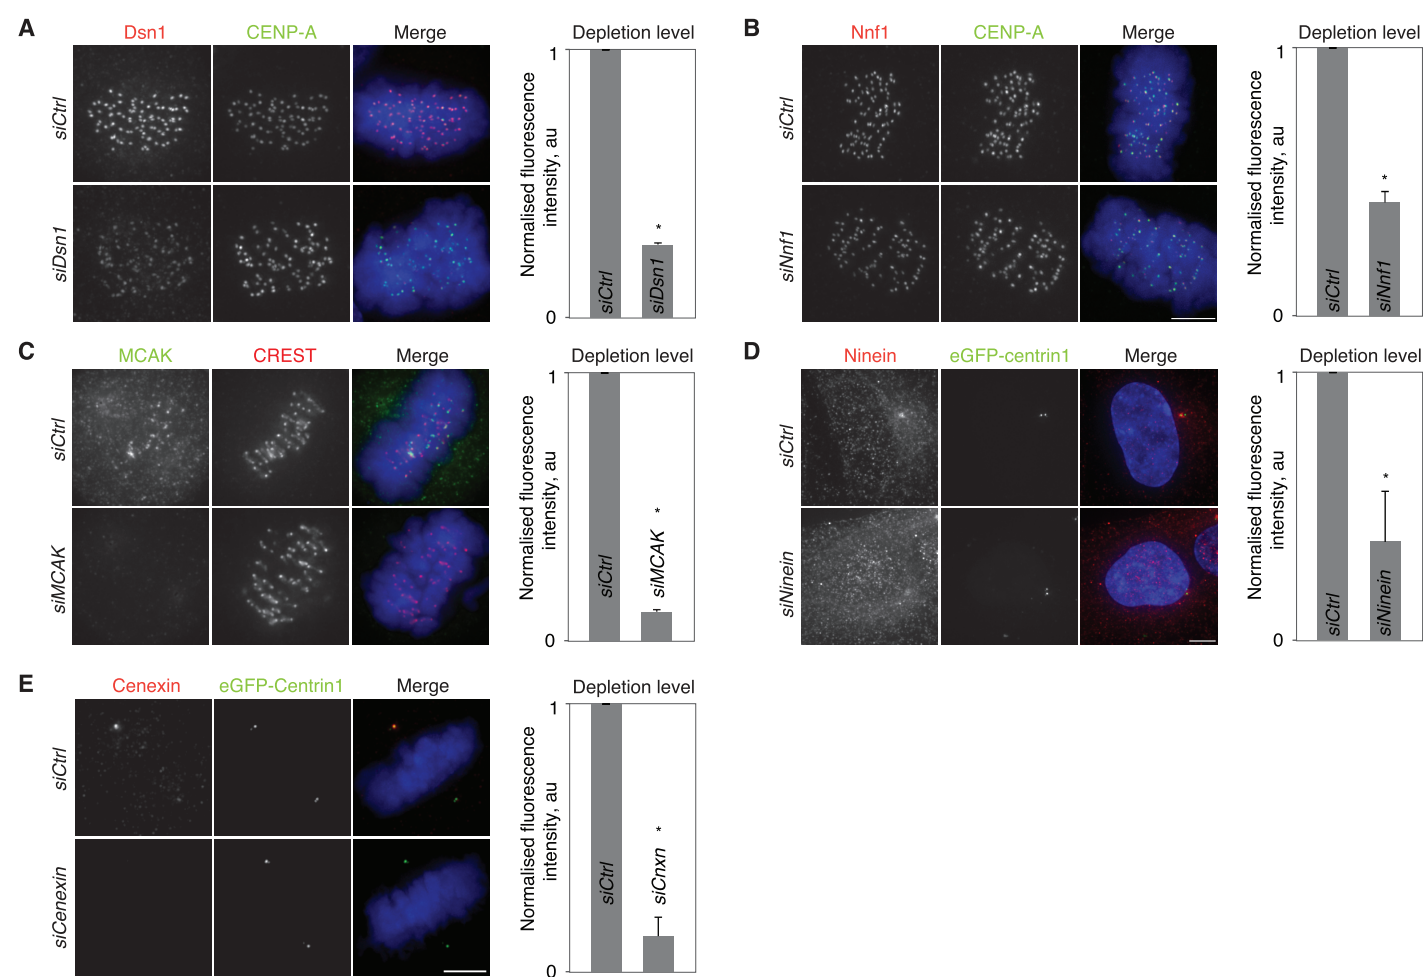

Supplement: supp [file elife-07909-supp-v1.zip]

Figure 3 Figure Supplement 3  
Gasic et al.,

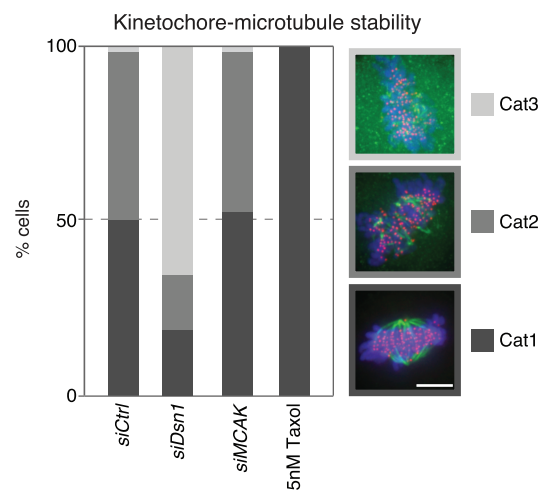

Supplement: supp [file elife-07909-supp-v1.zip]

Figure 3 Figure Supplement 1  
Gasic et al.,

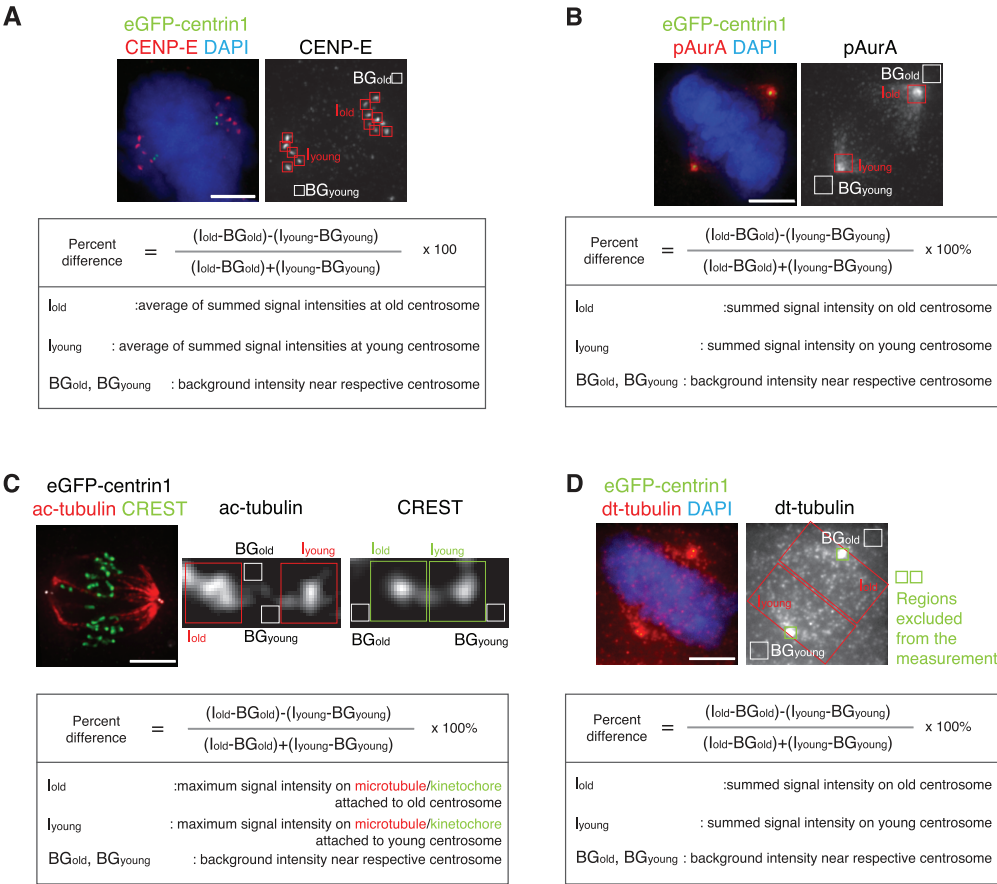

Supplement: supp [file elife-07909-supp-v1.zip]

Figure 2 Figure Supplement 1  
Gasic et al.,

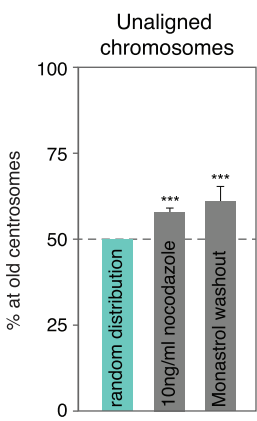

Supplement: supp [file elife-07909-supp-v1.zip]
